# Supplementary material
Source: publisher site journal article supplement (https://www.spandidos-publications.com/3134/downloadSupplementary)
Supplement: Supplementary file 1 [file downloadSupplementary]

## Sheet: Sheet1
Table SXV. Gene Ontology analysis of the differentially expressed mRNAs involved in the long non-coding RNA -associated competing endogenous RNA network.
Category	Term	Count	%	P-value	Genes	List Total	Pop Hits	Pop Total	Fold Enrichment	Bonferroni	Benjamini	False discovery rate
GOTERM_BP_DIRECT	GO:0002504~antigen processing and presentation of peptide or polysaccharide antigen via MHC class II	2	0.030216	0.0297108	RT1-DB1, RT1-BA	49	11	17535	65.0649	0.999975	0.999975	33.8127
GOTERM_BP_DIRECT	GO:0006955~immune response	4	0.0604321	0.0365288	RT1-DB1, VTN, RT1-BA, RT1-A3	49	267	17535	5.36116	0.999998	0.998542	39.9003
GOTERM_BP_DIRECT	GO:0019886~antigen processing and presentation of exogenous peptide antigen via MHC class II	2	0.030216	0.0376626	RT1-DB1, RT1-BA	49	14	17535	51.1224	0.999999	0.988798	40.8608
GOTERM_BP_DIRECT	GO:0019373~epoxygenase P450 pathway	2	0.030216	0.0662769	CYP2F4, CYP2C11	49	25	17535	28.6286	1	0.997564	60.8703
GOTERM_BP_DIRECT	GO:0019433~triglyceride catabolic process	2	0.030216	0.0662769	APOA4, PLIN1	49	25	17535	28.6286	1	0.997564	60.8703
GOTERM_BP_DIRECT	GO:0006730~one-carbon metabolic process	2	0.030216	0.0739352	CAR13, MAT1A	49	28	17535	25.5612	1	0.995448	65.0403
GOTERM_BP_DIRECT	GO:0034341~response to interferon-gamma	2	0.030216	0.0764742	RT1-DB1, RT1-BA	49	29	17535	24.6798	1	0.990477	66.3292
GOTERM_BP_DIRECT	GO:0006805~xenobiotic metabolic process	2	0.030216	0.0790065	CYP26B1, CYP2C11	49	30	17535	23.8571	1	0.983867	67.5707
GOTERM_BP_DIRECT	GO:0032094~response to food	2	0.030216	0.0840505	APOA4, SLC16A1	49	32	17535	22.3661	1	0.978762	69.9182
GOTERM_BP_DIRECT	GO:0035556~intracellular signal transduction	4	0.0604321	0.0860781	ITK, PPP1R1B, PPP1R1A, SHC3	49	381	17535	3.75703	1	0.970115	70.8166
GOTERM_BP_DIRECT	GO:0071385~cellular response to glucocorticoid stimulus	2	0.030216	0.0940577	EPHX1, RT1-BA	49	36	17535	19.881	1	0.968795	74.1164
GOTERM_CC_DIRECT	GO:0031090~organelle membrane	4	0.0604321	0.00206485	CYP2F4, CYP26B1, EPHX1, CYP2C11	53	90	18520	15.5304	0.15765	0.15765	2.18915
GOTERM_CC_DIRECT	GO:0042613~MHC class II protein complex	2	0.030216	0.0386128	RT1-DB1, RT1-BA	53	14	18520	49.9191	0.961932	0.804889	34.406
GOTERM_CC_DIRECT	GO:0005615~extracellular space	8	0.120864	0.0736043	APOA4, PPP1R1A, RT1-DB1, CSTB, VTN, PDE4C, LOX, APLN	53	1316	18520	2.12422	0.998246	0.879393	55.9003
GOTERM_MF_DIRECT	GO:0015293~symporter activity	3	0.0453241	0.00599296	SLC16A1, SLC5A8, MFSD2A	47	42	16650	25.304	0.576657	0.576657	6.87126
GOTERM_MF_DIRECT	GO:0004865~protein serine/threonine phosphatase inhibitor activity	2	0.030216	0.0299829	PPP1R1B, PPP1R1A	47	11	16650	64.4101	0.987134	0.886571	30.2684
GOTERM_MF_DIRECT	GO:0022857~transmembrane transporter activity	2	0.030216	0.0564758	SV2B, UCP1	47	21	16650	33.7386	0.999755	0.937402	49.7653
GOTERM_MF_DIRECT	GO:0020037~heme binding	3	0.0453241	0.0769112	CYP2F4, CYP26B1, CYP2C11	47	166	16650	6.4022	0.999989	0.942792	61.2401
GOTERM_MF_DIRECT	GO:0008392~arachidonic acid epoxygenase activity	2	0.030216	0.0898605	CYP2F4, CYP2C11	47	34	16650	20.8385	0.999999	0.932316	67.2116
GOTERM_MF_DIRECT	GO:0042605~peptide antigen binding	2	0.030216	0.097399	RT1-DB1, RT1-BA	47	37	16650	19.1489	1	0.913041	70.2873
